# Supplementary material
Source: publisher figshare collection journal article supplement (https://tandf.figshare.com/ndownloader/files/14388065)
Supplement: Supplementary file 1 [file 14388065]

**Supplementary Fig. 1. Light response curve or *M. truncatula* grown under LP (0.010 mM, dark grey solid line) and the control (0.500mM, light grey solid line). Values represent means (*n*=3), while the bars represent standard error. Dashed lines represent third order polynomial curves.**
